# Supplementary material
Source: PubMed Central journal article supplement (PMC4205964)
Supplement: NIHMS634878-supplement-1.pdf [file NIHMS634878-supplement-1.pdf]

Supplementary Fig. 1

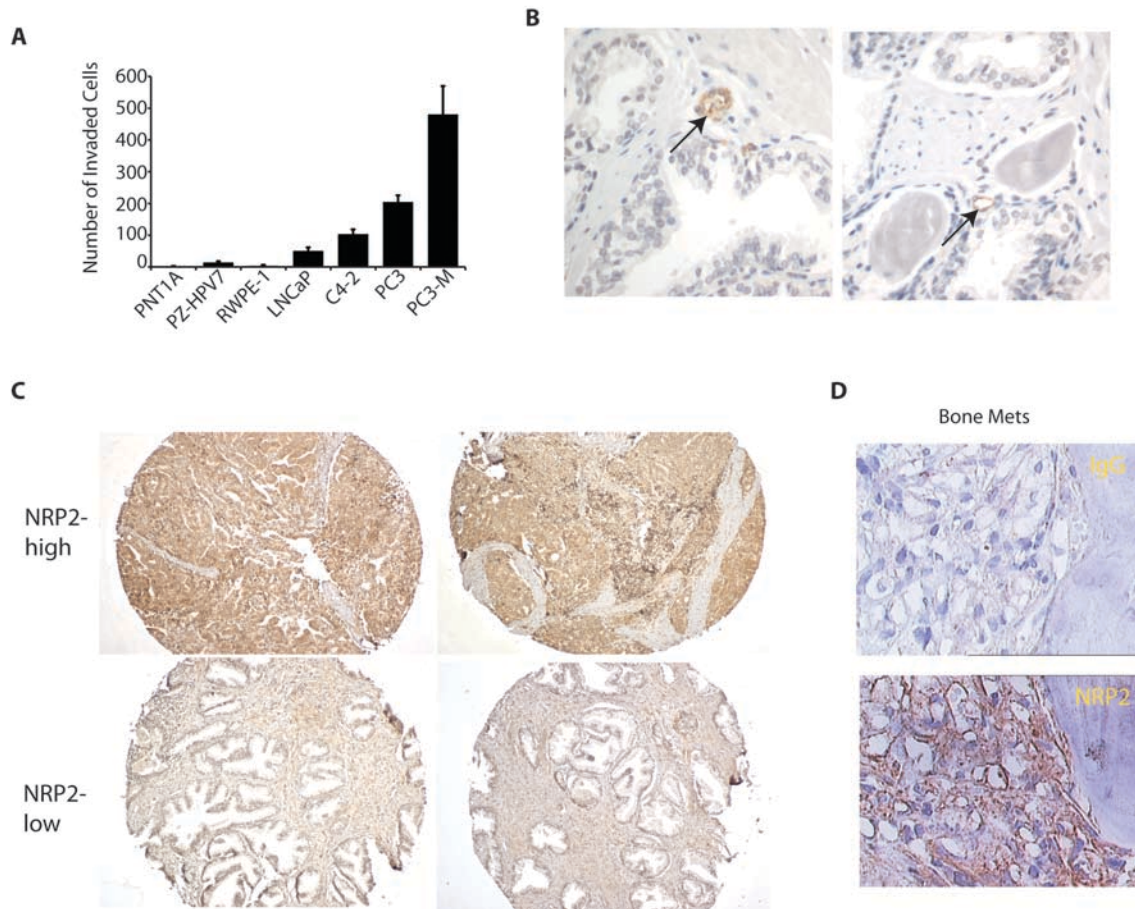

**Figure S1.** (A) Normal (PNT1A, PZ-HPV7 and RWPE-1) or prostate cancer cell lines (LNCaP, C4-2, PC3 and PC3-M) were plated in the upper chamber of Matrigel-coated Transwells. After 12 hours, cells that had invaded to the bottom of the membranes were stained with DAPI and counted in 20 random fields. Note that the degree of invasion correlates with NRP2 expression in these cell lines (see Figure 1A). (B) Normal prostate glands were immunostained with NRP2 Ab. Arrows indicate positively stained blood vessels. (C) A prostate tissue microarray containing benign and cancerous prostate glands was immunostained using a NRP2 Ab. Two representative photos of NRP2-high and NRP2-low areas are shown. (D) Specimens of prostate bone metastases were immunostained for NRP2 or control IgG.
