# Supplementary material
Source: PubMed Central journal article supplement (PMC4205964)
Supplement: NIHMS634878-supplement-3.pdf [file NIHMS634878-supplement-3.pdf]

Supplementary Fig. 3

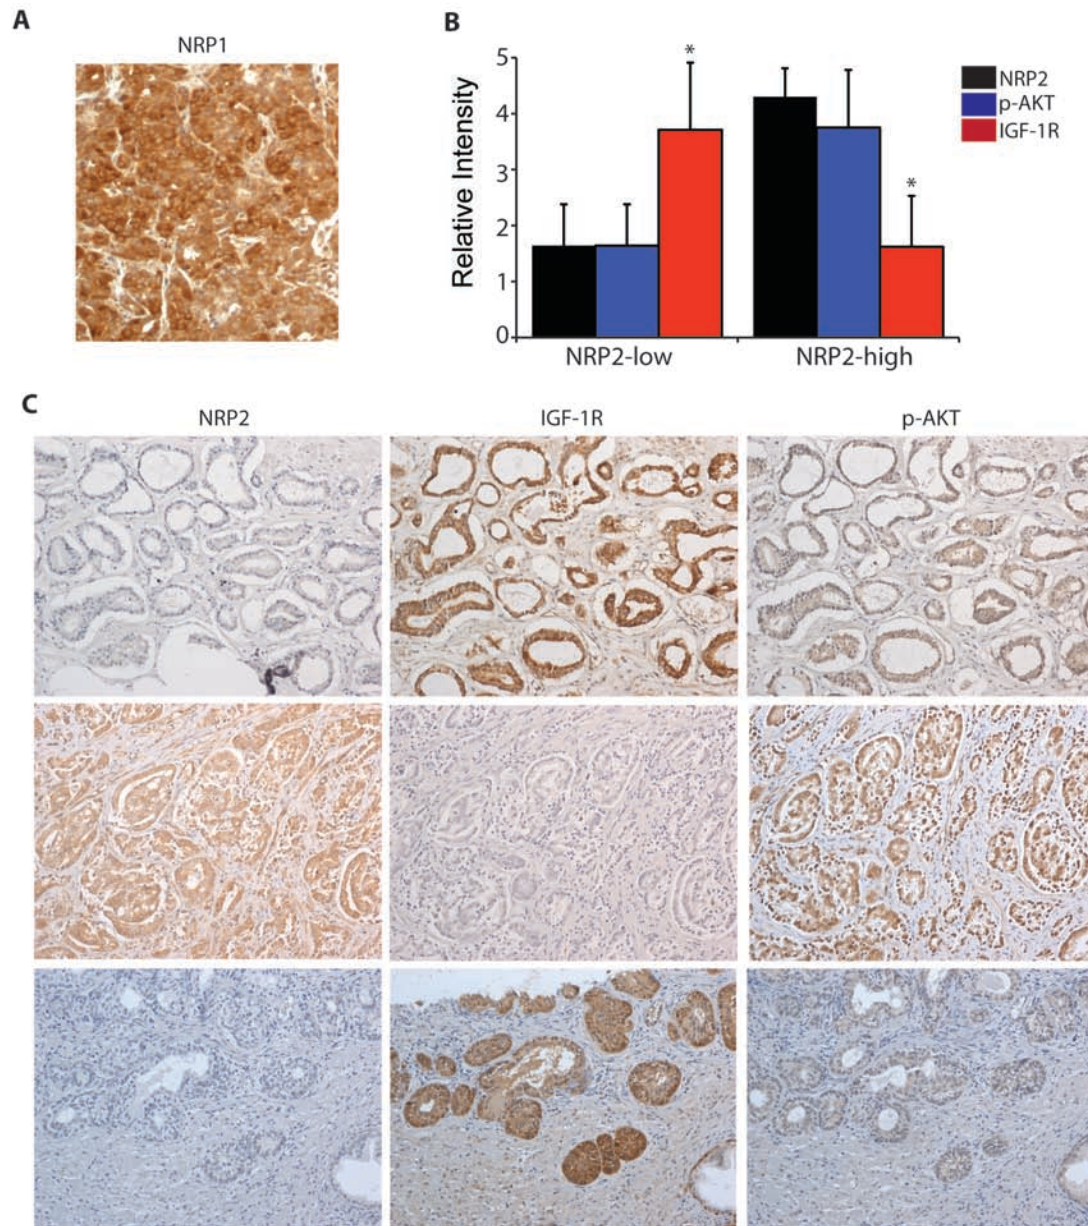

**Figure S3.** (A) A paraffin-embedded and formalin-fixed PyV-MT mammary tumor specimen was immunostained with the same NRP1 antibody used in Fig. 2B. (B-C) Consecutive sections of human prostate cancer specimens (n=22) were immunostained for NRP2, IGF-1R and p-AKT. Immunostaining was graded on a scale of 1-5 by two independent investigators (IL and HLG). Results show that IGF-1R is inversely correlated with NRP2 ( $p < 0.01$ ) and p-AKT ( $p < 0.01$ ), and that NRP2 is positively correlated with p-AKT ( $p < 0.01$ ).
