# Supplementary material
Source: PubMed Central journal article supplement (PMC4205964)
Supplement: NIHMS634878-supplement-4.pdf [file NIHMS634878-supplement-4.pdf]

Supplementary Fig. 4

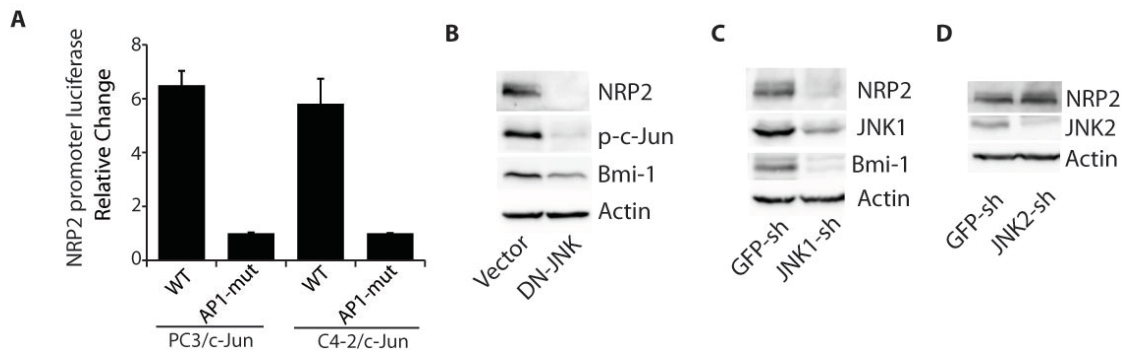

**Figure S4.** (A) Site directed mutagenesis of the c-Jun binding site in the NRP2 promoter was done using QuickChange Site-Directed Mutagenesis Kit (Agilent Technologies). PC3 cells expressing c-Jun were transfected with either the wild type or mutated NRP2 promoter reporter construct and luciferase activity was normalized to Renilla. (B) PC3 cells were transfected with either a dominant-negative JNK (JBD-JIP1) or vector and immunoblotted for NRP2, p-c-Jun, Bmi-1 and actin. (C) PC3 cells were transfected with shRNAs specific to either JNK1 or GFP (TRC library, Open Biosystem) and immunoblotted with NRP2, JNK1, Bmi-1 and actin. (D) PC3 cells were transfected with shRNAs specific to either JNK2 or GFP (TRC library, Open Biosystem) and immunoblotted for NRP2, JNK2 and actin.
