# Supplementary material
Source: PubMed Central journal article supplement (PMC4205964)
Supplement: NIHMS634878-supplement-5.pdf [file NIHMS634878-supplement-5.pdf]

Supplementary Fig. 5

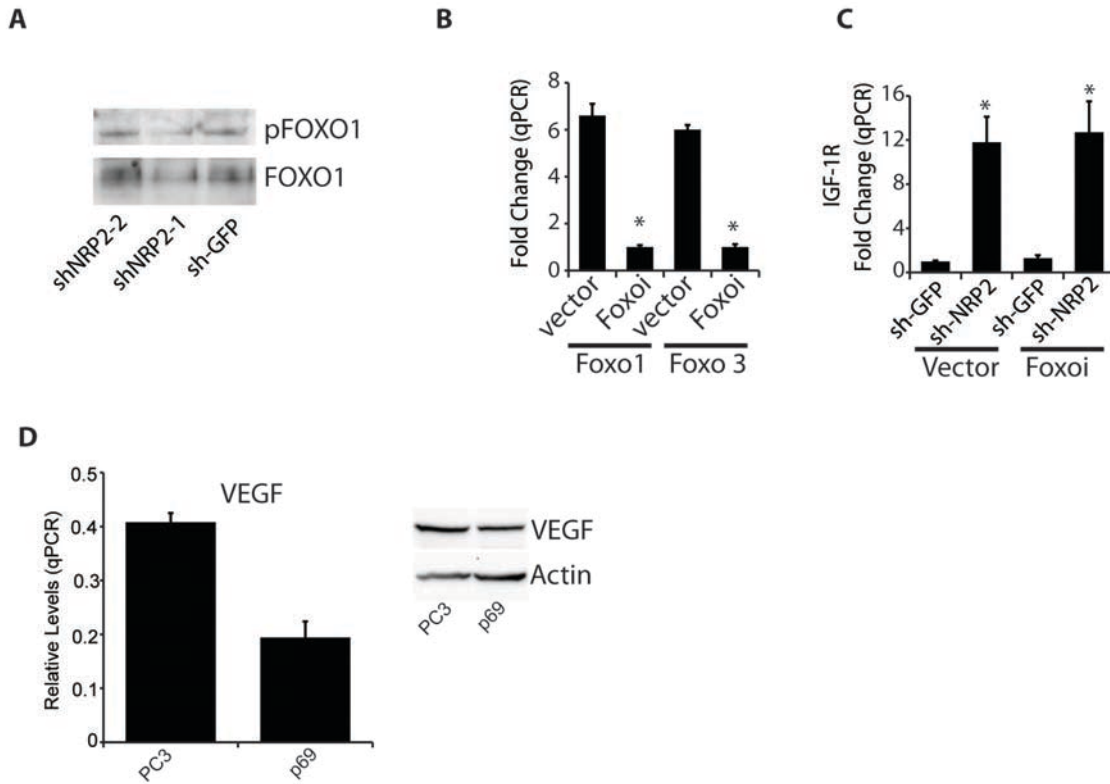

**Figure S5.** (A) PC3 cells stably expressing sh-GFP or sh-NRP2 were immunoblotted for pFOXO1 or total FOXO1. (B-C) PC3 (sh-GFP or sh-NRP2) cells were transfected with vector or an shRNA construct targeting the sequence GAGCGTGCCCTACTTCAAGG, which is conserved in all FOXO members and was provided by Dr. Azad Bonni (Harvard Medical School, Boston, MA). Down-regulation of FOXO1 and FOXO3 (expressed in this cell line) was confirmed using qRT-PCR (B). Effect of FOXO down-regulation on IGF-1R expression was quantified using qRT-PCR (C). (D) The expression of VEGF in p69 cells was assessed by qPCR and immunoblotting, and compared to PC3 cells, which express exceptionally high levels of VEGF.
