# Supplementary material
Source: PubMed Central journal article supplement (PMC4205964)
Supplement: NIHMS634878-supplement-7.pdf [file NIHMS634878-supplement-7.pdf]

Supplementary Fig. 7

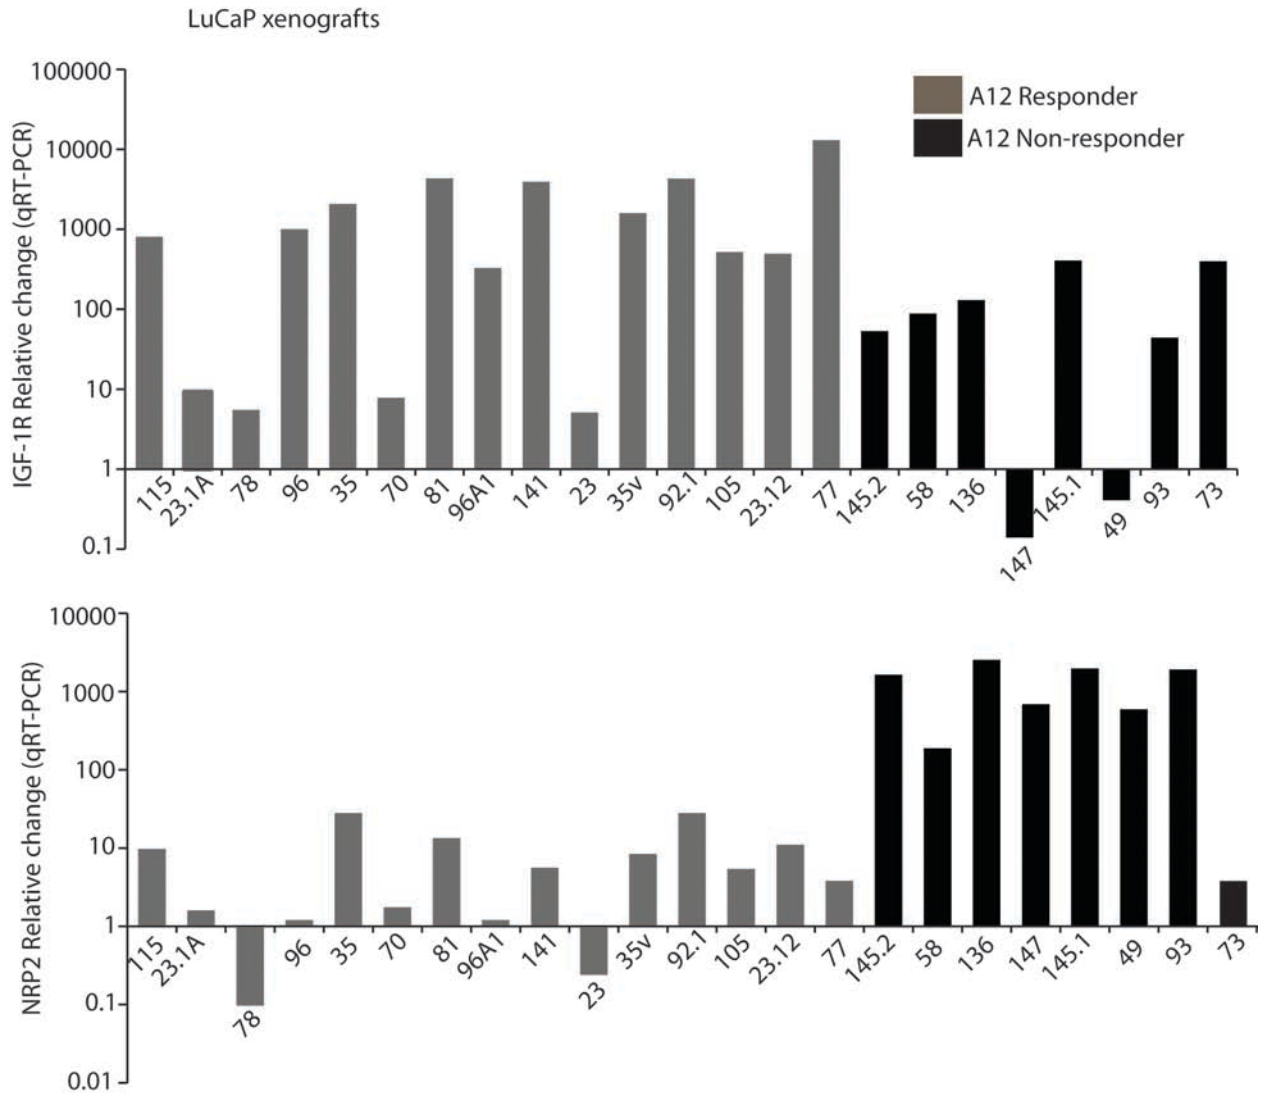

**Figure S7.** LuCaP xenografts that differ in their response to A12 (responders and non-responders) were assayed for their expression of NRP2 and IGF-1R by qPCR. Tumors from 15 A12-responders and 8 non-responders were used. The data reveal 150-fold more NRP2 expression in the non-responders compared to responders, and only a 10-fold increase in IGF-1R expression in the responders compared to the non-responders.
