# Supplementary material
Source: PubMed Central journal article supplement (PMC4205964)
Supplement: NIHMS634878-supplement-8.pdf [file NIHMS634878-supplement-8.pdf]

Supplementary Fig. 8

| <b>qPCR primers</b> | <b>Sense</b>           | <b>Antisense</b>       |
|---------------------|------------------------|------------------------|
| Bmi-1               | TGCTGGAGAAGTGGAAAGTG   | GATGAGGAGACTGCACTGGA   |
| EGF receptor        | TCCAGTGTGCCACTACATT    | TCTGCGTACTTCCAGACCAG   |
| Insulin Receptor    | GCACGTGTGTGTGTCCATTA   | ATTCCCAAAGCATCAACTCC   |
| IGF-1R              | CTTCTGGACAAGCCAGACAA   | AGGCTCCATCTCCTCTTTGA   |
| NRP2                | TGCTCTACTGCACCTGTTCC   | AGTTCTCCAGTGTGGTGCAG   |
| GAPDH               | ATCATCCCTGCCTCTACTGG   | GTCAGGTCCACCACTGACAC   |
| Coup-TFII           | GGACCACATACGGATCTTCCAA | ACCACAGGCATCTGAGGTGAAC |
| c-Jun               | CAGCCCACTGAGAAGTCAA    | CACCAATTCCTGCTTTGAGA   |
| Foxo 1              | CTGGCTCTCACAGCAATGAT   | CACCATAGAATGCACATCCC   |
| Foxo 3              | GTTCAATGGGAGCTTGAAT    | TGTGGAGATGAGGGAATCAA   |

  

| <b>CHIP primers</b>    | <b>Sense</b>             | <b>Antisense</b>           |
|------------------------|--------------------------|----------------------------|
| <b>IGF-1R promoter</b> |                          |                            |
| IGF-1R-1               | CCGACGAGTGGAGAAAGTGAGT   | GGGCTGTCAGGACGGAGAAAGA     |
| IGF-1R-2               | AGCCGCTCATTCAATTTGAC     | GGGGGAAAAGTCAAAGAA         |
| IGF-1R-3               | GGGCTCTTGTTTACCAGCAT     | GCTCGCTGAAGGTCACAGC        |
| IGF-1R-4               | GCAACAGCTGCAAGAAACAA     | GCCCGACTCCAAAAACAAT        |
| IGF-1R-5               | TCTCTCCTCGAGCCACTCTG     | TTCGCTGCGTACTGGAAAG        |
| IGF-1R (qPCR)          | GGGCTCTTGTTTACCAGCAT     | CTCTCGAGTTCGCCTGGT         |
| <b>NRP2 promoter</b>   |                          |                            |
| NP1                    | TCTTCCCCAGGGCGTTAC       | GGCAGAGCTATCCGATTACG       |
| NP2                    | GAGACGCCTTCAAGCACCTA     | GGCGTTACAAGAGGAGTTGG       |
| NP3                    | AGCTAATGGGCAAGTCCAGA     | CTGAGGATGGCTTTGTGGAT       |
| NP4                    | ACATAAACCGGGATCTCTGC     | TGGAAATCCACAGGCTGAGT       |
| NP5                    | CAGGGATGGAAACCTGAGAC     | CACTGTGAAAGGGGAAAGA        |
| NP6                    | AACCCGATTTTTGACACTGG     | TCTCCCCAGCCTACTCTGA        |
| NP7                    | GTTTCATGTTCCCCCACATC     | AAGGCCAGTGTCAAAAATCG       |
| RT1 (qPCR)             | CCCGTCAAAGGAATGGAATGTGGA | ATTAGCGAAGCTGAGATTCCTGGC   |
| RT2 (qPCR)             | ACTCAGCCTGTGGATTTCCACTCT | CTGGACTTGCCCATTAGCTTTATCAC |
| RT3 (qPCR)             | ACTGTTAGCTTGCAGTTCCTC    | GTGCTTGAAGGCGTCTCATCCAAA   |
| RT4 (qPCR)             | CGGCTGCCTCTTTAATCAGGAACA | AGCAGCATGTGGATGTCAGAGC     |

**Figure S8.** Primer sequences used in this study for semi-quantitative or qPCR.
